# Supplementary material for: Prediction of Microvascular Invasion in Hepatocellular Carcinoma via Deep Learning: A Multi-Center and Prospective Validation Study
Source: MDPI journal article supplement (doi:10.3390/cancers13102368), 2021-05-14
Supplement: s1 [file s1]

**Table 1.** Stratification analysis CDLM<sup>EOB-MRI</sup> and CDLM<sup>CE-CT</sup>.

|                         |                   | CDLM <sup>CE-CT</sup>                       |                                              |       |                                             |                                            |                                         |       |                                     |
|-------------------------|-------------------|---------------------------------------------|----------------------------------------------|-------|---------------------------------------------|--------------------------------------------|-----------------------------------------|-------|-------------------------------------|
| Different models        |                   | Retrospective training cohort<br>(n=306)    |                                              |       |                                             | Prospective validation cohort 2<br>(n=115) |                                         |       |                                     |
|                         |                   | SEN                                         | SPE                                          | ACC   | AUC<br>(95% CI)                             | SEN                                        | SPE                                     | ACC   | AUC<br>(95% CI)                     |
| Age (years)             | ≤50               | 68.8%                                       | 94.7%                                        | 82.8% | 0.850<br>(0.755-0.944)                      | 48.5%                                      | 88.9%                                   | 66.7% | 0.668<br>(0.528-0.808)              |
|                         | >50               | 44.3%                                       | 95.2%                                        | 80.1% | 0.834<br>(0.778-0.890)                      | 57.1%                                      | 91.2%                                   | 78.2% | 0.825<br>(0.780-0.941)              |
|                         | <i>p</i> value    | 0.037                                       | 1                                            |       | 0.786                                       | 0.733                                      | 1                                       |       | 0.091                               |
| Gender                  | Male              | 64.9%                                       | 86.2%                                        | 79.2% | 0.826<br>(0.770-0.882)                      | 61.5%                                      | 86.3%                                   | 75.6% | 0.747<br>(0.642-0.852)              |
|                         | Female            | 72.0%                                       | 95.6%                                        | 87.1% | 0.888<br>(0.804-0.972)                      | 53.3%                                      | 70.0%                                   | 60.0% | 0.687<br>(0.466-0.907)              |
|                         | <i>p</i> value    | 0.684                                       | 0.143                                        |       | 0.232                                       | 0.81                                       | 0.421                                   |       | 0.631                               |
| α-fetoprotein           | <20ng/mL (A)      | 56.4%                                       | 92.3%                                        | 83.3% | 0.797<br>(0.712-0.882)                      | 76.5%                                      | 56.5%                                   | 65.0% | 0.660<br>(0.480-0.840)              |
|                         | 20–400 ng/mL (B)  | 90.6%                                       | 65.9%                                        | 76.3% | 0.859<br>(0.779-0.939)                      | 75.0%                                      | 68.2%                                   | 70.6% | 0.735<br>(0.552-0.918)              |
|                         | >400 ng/mL (C)    | 80.7%                                       | 86.1%                                        | 83.8% | 0.881<br>(0.801-961)                        | 80.0%                                      | 68.8%                                   | 75.6% | 0.703<br>(0.524-0.881)              |
|                         | <i>p</i> value    | A vs B: 0.010<br>A vs C: 0.177<br>B vs C: 1 | A vs B: <0.001<br>A vs C: 1<br>B vs C: 0.156 |       | A vs B: 0.887<br>A vs C: 0.484<br>B vs C: 1 | A vs B: 1<br>A vs C: 0.456<br>B vs C: 1    | A vs B: 1<br>A vs C: 0.313<br>B vs C: 1 |       | A vs B: 1<br>A vs C: 1<br>B vs C: 1 |
| Tumor margin            | Smooth margin     | 95.0%                                       | 88.6%                                        | 91.4% | 0.951<br>(0.920-0.982)                      | 73.0%                                      | 83.3%                                   | 77.1% | 0.804<br>(0.687-0.921)              |
|                         | Non-smooth margin | 88.2%                                       | 95.5%                                        | 93.8% | 0.971<br>(0.942-0.999)                      | 57.4%                                      | 90.0%                                   | 79.1% | 0.845<br>(0.771-0.920)              |
|                         | <i>p</i> value    | 0.372                                       | 0.106                                        |       | 0.361                                       | 0.245                                      | 0.611                                   |       | 0.563                               |
| Peritumoral enhancement | Present           | 77.4%                                       | 89.2%                                        | 83.9% | 0.878<br>(0.815-0.941)                      | 53.3%                                      | 76.5%                                   | 61.7% | 0.586<br>(0.411-0.761)              |
|                         | Absent            | 51.0%                                       | 93.5%                                        | 82.5% | 0.803<br>(0.734-0.873)                      | 50.0%                                      | 95.5%                                   | 79.4% | 0.758<br>(0.632-0.883)              |
|                         | <i>p</i> value    | 0.03                                        | 1                                            |       | 0.36                                        | 1                                          | 0.239                                   |       | 0.368                               |
|                         | Atypical          | 84.0%                                       | 69.2%                                        | 72.4% | 0.802                                       | 66.7%                                      | 80.0%                                   | 75.0% | 0.6                                 |

|                                          |                        |                                     |                                             |       |                                            |                                         |                                         |       |                                     |
|------------------------------------------|------------------------|-------------------------------------|---------------------------------------------|-------|--------------------------------------------|-----------------------------------------|-----------------------------------------|-------|-------------------------------------|
| Enhance-<br>ment Pattern                 | Typical                | 77.9%                               | 82.3%                                       | 80.5% | (0.716-0.889)<br>0.862<br>(0.808-0.917)    | 60.8%                                   | 85.7%                                   | 73.8% | (0.094-1)<br>0.748<br>(0.654-0.842) |
|                                          | <i>p</i> value         | 1                                   | 0.130                                       |       | 0.754                                      | 1                                       | 1                                       |       |                                     |
| Tumor size                               | 2cm-5cm                | 88.0%                               | 57.1%                                       | 64.2% | 0.784<br>(0.692-0.875)                     | 53.3%                                   | 74.1%                                   | 66.7% | 0.603<br>(0.424-0.781)              |
|                                          | >5cm                   | 98.1%                               | 81.1%                                       | 89.6% | 0.962<br>(0.931-0.992)                     | 71.8%                                   | 76.9%                                   | 73.9% | 0.712<br>(0.577-0.847)              |
|                                          | <i>p</i> value         | 0.541                               | 0.020                                       |       | 0.001                                      | 1                                       | 1                                       |       | 0.433                               |
| CDLM <sup>EOB-MRI</sup>                  |                        |                                     |                                             |       |                                            |                                         |                                         |       |                                     |
| Retrospective training cohort<br>(n=329) |                        |                                     |                                             |       | Prospective validation cohort 2<br>(n=115) |                                         |                                         |       |                                     |
| Different models                         |                        | SEN                                 | SPE                                         | ACC   | AUC<br>(95% CI)                            | SEN                                     | SPE                                     | ACC   | AUC<br>(95% CI)                     |
| Age (years)                              | ≤50                    | 100%                                | 91.4%                                       | 94.5% | 0.968<br>(0.938-0.999)                     | 78.8%                                   | 66.7%                                   | 73.3% | 0.750<br>(0.621-0.880)              |
|                                          | >50                    | 89.6%                               | 91.7%                                       | 91.0% | 0.959<br>(0.934-0.985)                     | 76.2%                                   | 76.5%                                   | 76.4% | 0.869<br>(0.771-0.967)              |
|                                          | <i>p</i> value         | 0.101                               | 1                                           |       | 0.650                                      | 1                                       | 0.575                                   |       | 0.155                               |
| Gender                                   | Male                   | 95.9%                               | 91.5%                                       | 93.0% | 0.966<br>(0.946-0.986)                     | 71.8%                                   | 84.3%                                   | 78.9% | 0.836<br>(0.753-0.918)              |
|                                          | Female                 | 94.1%                               | 74.1%                                       | 81.8% | 0.928<br>(0.847-1)                         | 46.7%                                   | 90.0%                                   | 64.0% | 0.753<br>(0.543-0.964)              |
|                                          | <i>p</i> value         | 1                                   | 0.016                                       |       | 0.376                                      | 0.157                                   | 1                                       |       | 0.481                               |
| α-fetopro-<br>tein                       | <20ng/mL (A)           | 93.3%                               | 94.6%                                       | 94.3% | 0.973<br>(0.952-0.994)                     | 88.2%                                   | 60.9%                                   | 72.5% | 0.792<br>(0.642-0.941)              |
|                                          | 20–400 ng/mL (B)       | 87.0%                               | 94.9%                                       | 91.4% | 0.948<br>(0.900-0.996)                     | 91.7%                                   | 54.6%                                   | 67.7% | 0.765<br>(0.605-0.926)              |
|                                          | >400 ng/mL (C)         | 95.7%                               | 81.5%                                       | 88.0% | 0.971<br>(0.935-1)                         | 88.2%                                   | 60.9%                                   | 72.5% | 0.804<br>(0.641-0.967)              |
|                                          | <i>p</i> value         | A vs B: 1<br>A vs C: 1<br>B vs C: 1 | A vs B: 1<br>A vs C: 0.163<br>B vs C: 0.127 |       | A vs B: 1<br>A vs C: 1<br>B vs C: 1        | A vs B: 1<br>A vs C: 0.924<br>B vs C: 1 | A vs B: 1<br>A vs C: 0.405<br>B vs C: 1 |       | A vs B: 1<br>A vs C: 1<br>B vs C: 1 |
| Tumor mar-<br>gin                        | Smooth margin          | 95.0%                               | 88.6%                                       | 91.4% | 0.951<br>(0.920-0.982)                     | 72.4%                                   | 79.0%                                   | 75.0% | 0.762<br>(0.619-0.905)              |
|                                          | Non-smooth mar-<br>gin | 88.2%                               | 95.5%                                       | 93.8% | 0.971<br>(0.942-0.999)                     | 52.0%                                   | 90.5%                                   | 76.1% | 0.837<br>(0.741-0.933)              |
|                                          | <i>p</i> value         | 0.372                               | 0.106                                       |       | 0.361                                      | 0.205                                   | 0.409                                   |       | 0.397                               |

|                                          |                       |        |        |       |                        |        |       |       |                        |
|------------------------------------------|-----------------------|--------|--------|-------|------------------------|--------|-------|-------|------------------------|
| <b>Peritumoral<br/>enhance-<br/>ment</b> | Present               | 96.2%  | 84.4%  | 90.8% | 0.931<br>(0.877-0.986) | 78.1%  | 78.3% | 78.2% | 0.807<br>(0.682-0.932) |
|                                          | Absent                | 93.4%  | 92.4%  | 92.6% | 0.968<br>(0.946-0.991) | 27.3%  | 94.7% | 70.0% | 0.776<br>(0.653-0.900) |
|                                          | <b><i>p</i> value</b> | 0.808  | 0.182  |       | 0.219                  | <0.001 | 0.123 |       | 0.733                  |
| <b>Tumor size</b>                        | 2cm-5cm               | 95.1%  | 94.6%  | 94.8% | 0.973<br>(0.950-0.995) | 80.0%  | 63.0% | 69.1% | 0.704<br>(0.537-0.871) |
|                                          | >5cm                  | 100.0% | 11.1%  | 78.4% | 0.895<br>(0.775-1)     | 100.0% | 26.9% | 70.8% | 0.788<br>(0.665-0.911) |
|                                          | <b><i>p</i> value</b> | 0.575  | <0.001 |       | 0.217                  | 0.027  | 0.018 |       | 0.428                  |

SEN, sensitivity; SPE, specificity; ACC, accuracy; AUC, area under the curve; 95% CI, 95% confidence interval, EOB-MRI, gadoxetic acid-enhanced magnetic resonance imaging; CE-CT, contrast-enhanced computational tomography; T2WI, T2-weighted imaging; HBP, hepatobiliary phase; T1WI, T1-weighted imaging; CDLM, combined deep learning model.
